# Supplementary material for: A method to identify trace sulfated IgG N-glycans as biomarkers for rheumatoid arthritis
Source: PubMed Central journal article supplement (PMC5606999; doi:10.1038/s41467-017-00662-w), 2017-09-20
Supplement: 41467_2017_662_MOESM1_ESM.pdf [file 41467_2017_662_MOESM1_ESM.pdf]

## **Description of Supplementary Files**

File Name: Supplementary Information

Description: Supplementary figures, supplementary tables, supplementary methods

File Name: Supplementary Data 1

Description: Identification of acidic N-glycans released from the IgG of pooled human serum by using TiO<sub>2</sub>-PGC chip LC coupled with TOF MS

File Name: Supplementary Data 2

Description: Identification of neutral N-glycans released from the IgG of pooled human serum by using TiO<sub>2</sub>-PGC chip LC coupled with TOF MS

File Name: Supplementary Data 3

Description: MRM parameters for the quantification of N-glycans

File Name: Supplementary Data 4

Description: Quantitative profiling of N-glycans released from human serum IgGs

File Name: Supplementary Data 5

Description: Sensitivity and specificity of all combined N-glycan biomarkers for the classification of RA patients and healthy subjects

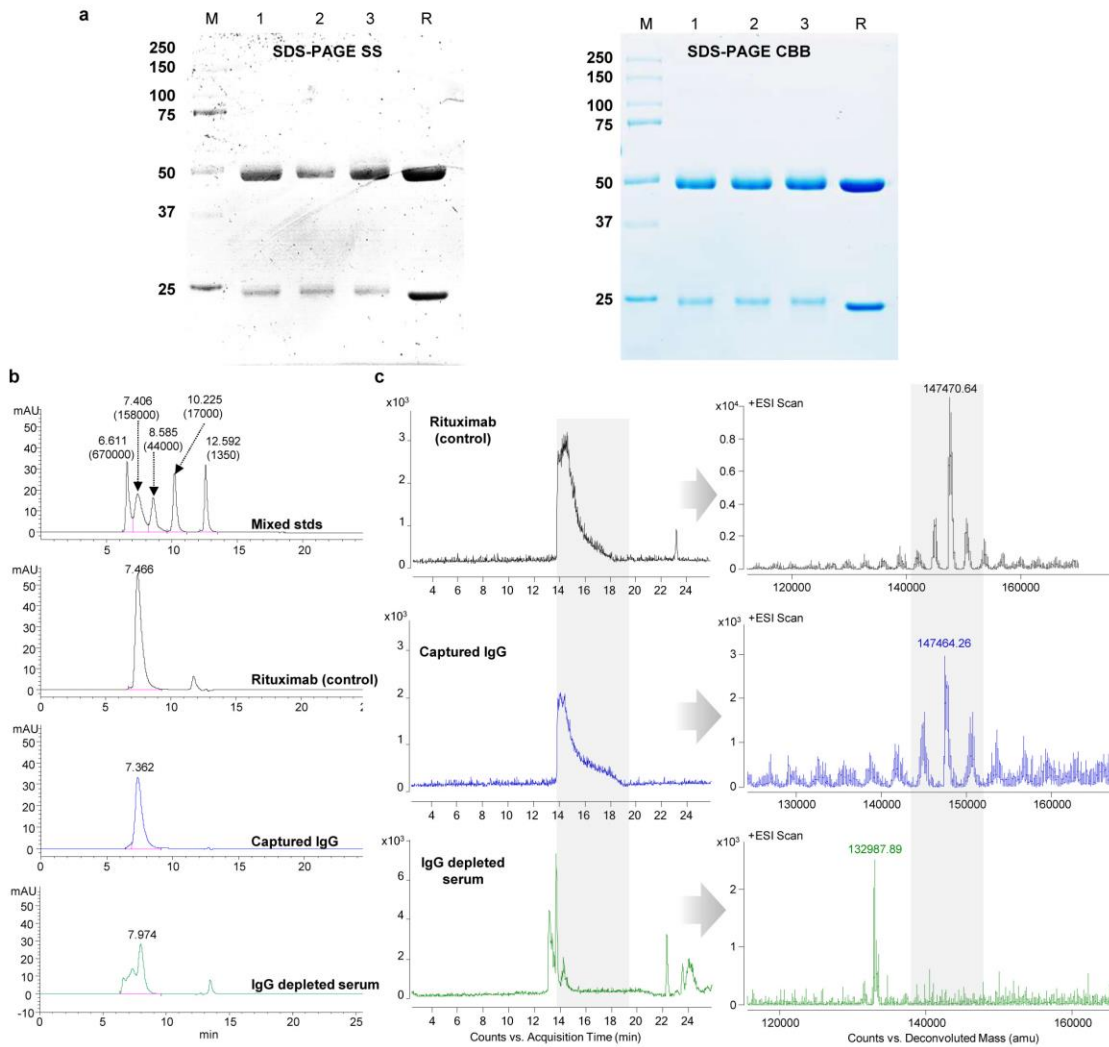

**Supplementary Figure 1 | Purity of IgGs captured from pooled human serum.** (a) SDS-PAGE of the serum IgG captured by using Protein A for 1-3 times (lane 1-3). Rituximab (lane “R”) was employed as a reference. Left panel, silver staining (SS); right panel, Coomassie Brilliant Blue (CBB) staining. (b) HPLC-UV chromatograms of IgG. The samples were separated on an SEC column (Bio-Sil SEC 125-5, 300 x 7.8 mm, 5  $\mu$ m). The mass of the captured IgG was calculated as approximately 158,000 based on the retention time and log (mass) of the mixed standards. (c) UHPLC-TOF MS chromatograms of the captured IgG and deconvoluted mass spectrum corresponding to the peak. The samples were separated on a C<sub>8</sub> UHPLC column (Kinetex 1.7  $\mu$ m C<sub>8</sub> 100 Å, Phenomenex).

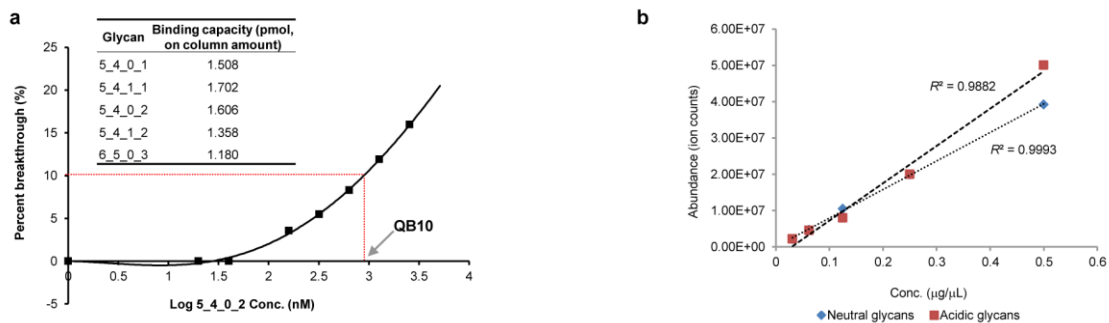

**Supplementary Figure 2 | Acidic N-glycans binding capacity of the TiO<sub>2</sub>-PGC chip. (a)** The acidic N-glycans binding capacities were estimated using a breakthrough experiment. The binding capacities of five acidic N-glycan standards (defined as the on-column amount, pmol) are shown in the table inserted. **(b)** Under the optimized conditions, both neutral and acidic N-glycans obtained from 0.03-0.5 µg of IgG can be quantitatively eluted.



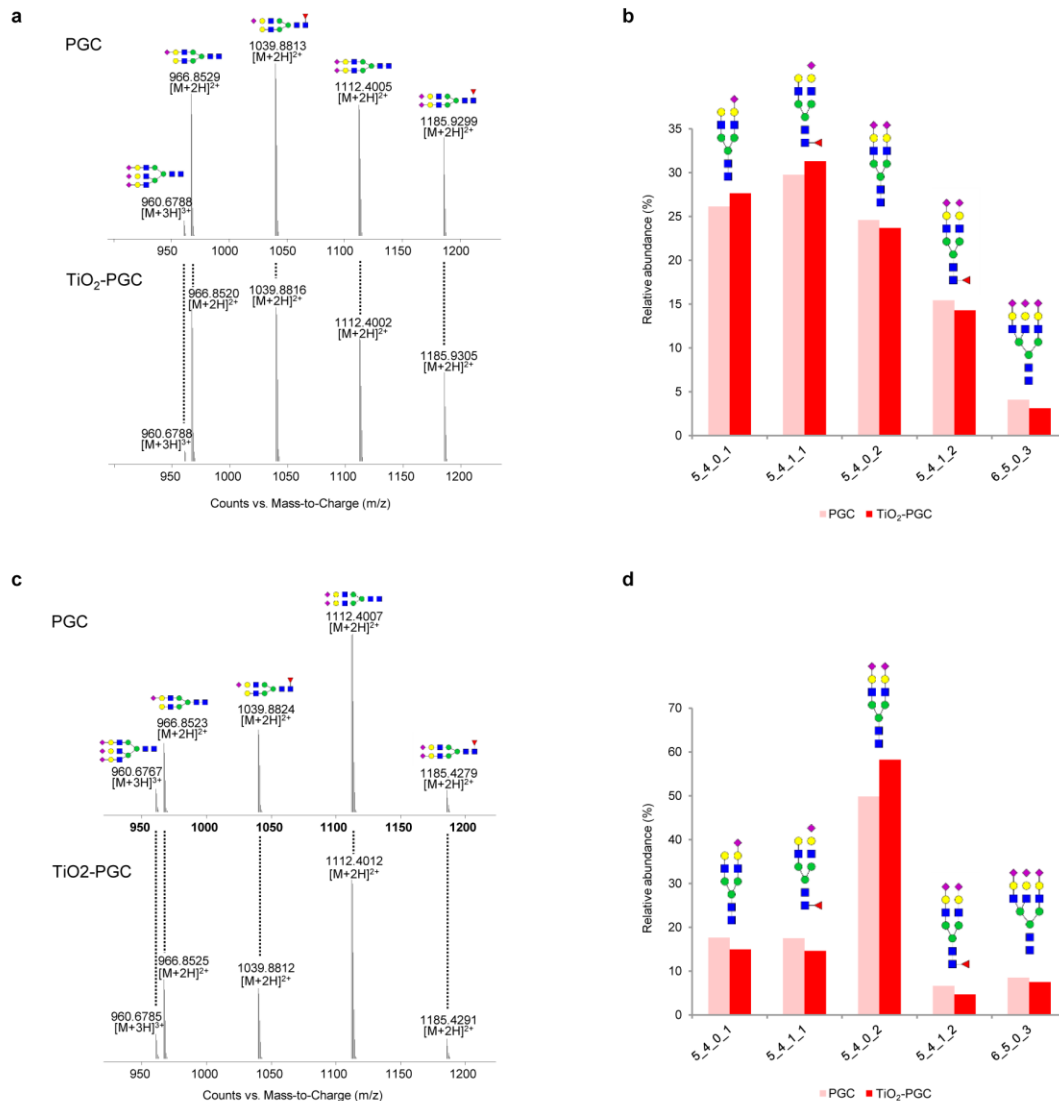

**Supplementary Figure 4 | Reserved profile of acidic N-glycans after on-chip enrichment.** The influence of on-chip enrichment on the profile of acidic N-glycans was examined using a set of acidic N-glycan standards and a complex acidic N-glycan mixture prepared from the total N-glycans released from human serum IgGs using the offline SAX method to ensure that “natural” and “real” acidic N-glycan profiles could be obtained after on-chip enrichment. **(a, c)** Full scan quadrupole time-of-flight mass spectra of 5 acidic N-glycan standards and a complex acidic N-glycan mixture analyzed using a routine PGC chip (without enrichment) and the TiO<sub>2</sub>-PGC chip (with enrichment by TiO<sub>2</sub>), respectively. **(b, d)** The relative abundances of all these species are conserved after enrichment by TiO<sub>2</sub>.

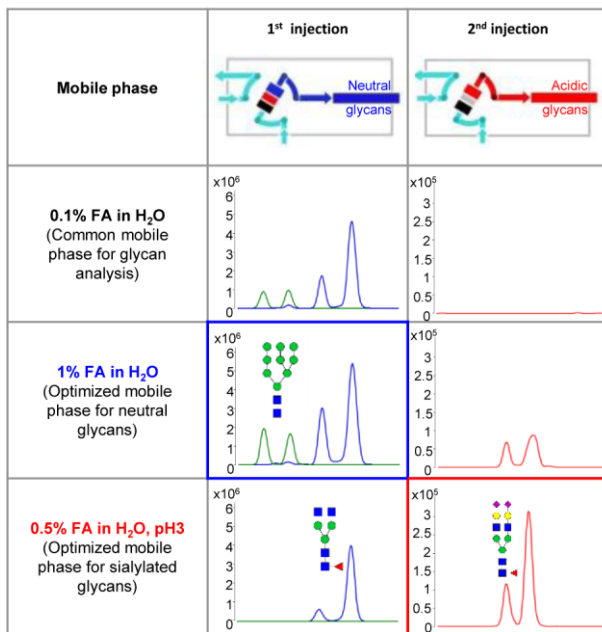

**Supplementary Figure 5 | Substantially improved detection of both neutral and acidic N-glycans using optimized dual mobile phases.**

Hex<sub>5</sub>HexNAc<sub>4</sub>dHex<sub>1</sub>NeuAc<sub>2</sub>+SO<sub>3</sub> as example

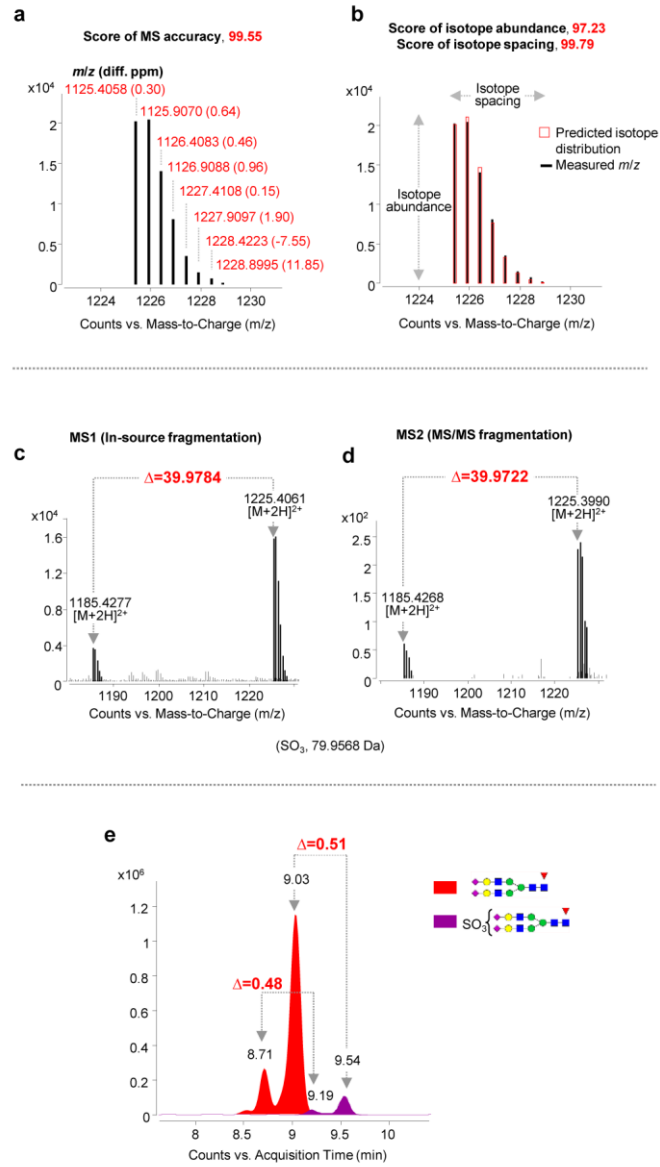

**Supplementary Figure 6 | Characterization of sulfated N-glycans based on accurate mass. (a)** MS accuracy, **(b)** isotope abundance and isotope spacing, **(c)** in-source fragmentation, **(d)** MS/MS fragmentation and **(e)** retention time of Hex<sub>5</sub>HexNAc<sub>4</sub>dHex<sub>1</sub>NeuAc<sub>2</sub>+SO<sub>3</sub>.

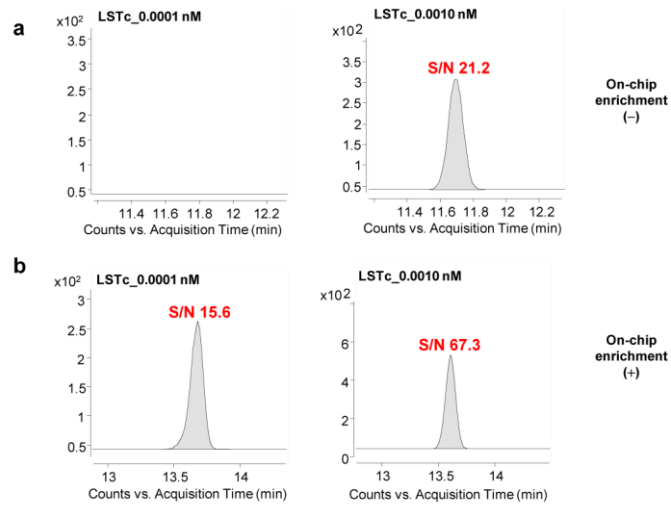

**Supplementary Figure 7 | Enhanced detection sensitivity of acidic N-glycans after on-chip enrichment.** Comparison of the MRM signal of the internal acidic O-glycan standard (LSTc) spiked into a complex neutral N-glycan mixture derived from the total N-glycans of serum IgG with (b) and without (a) on-chip enrichment.



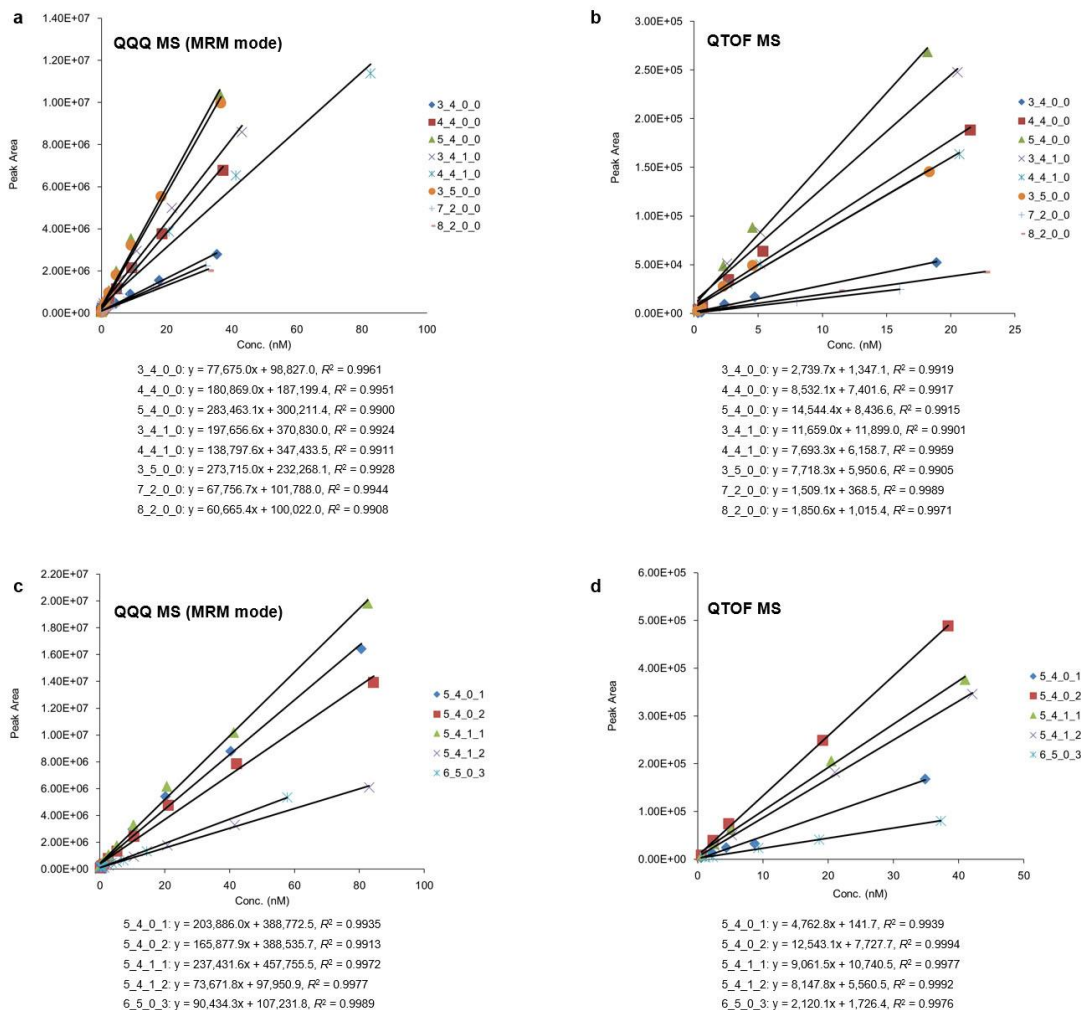

**Supplementary Figure 8 | Linearity of 8 neutral and 5 acidic N-glycan standards measured on QQQ MS in the MRM mode and Q-TOF MS.** Variation of neutral N-glycans (a, b) and acidic N-glycans (c, d) response factors (slope of the calibration curve, RF) measured via QQQ MS (maximum difference is 5-fold for neutral N-glycans and 3-fold for acidic N-glycans) is relatively smaller than that measured via Q-TOF MS (maximum difference is about 10-fold for neutral N-glycans and 6-fold for acidic N-glycans).

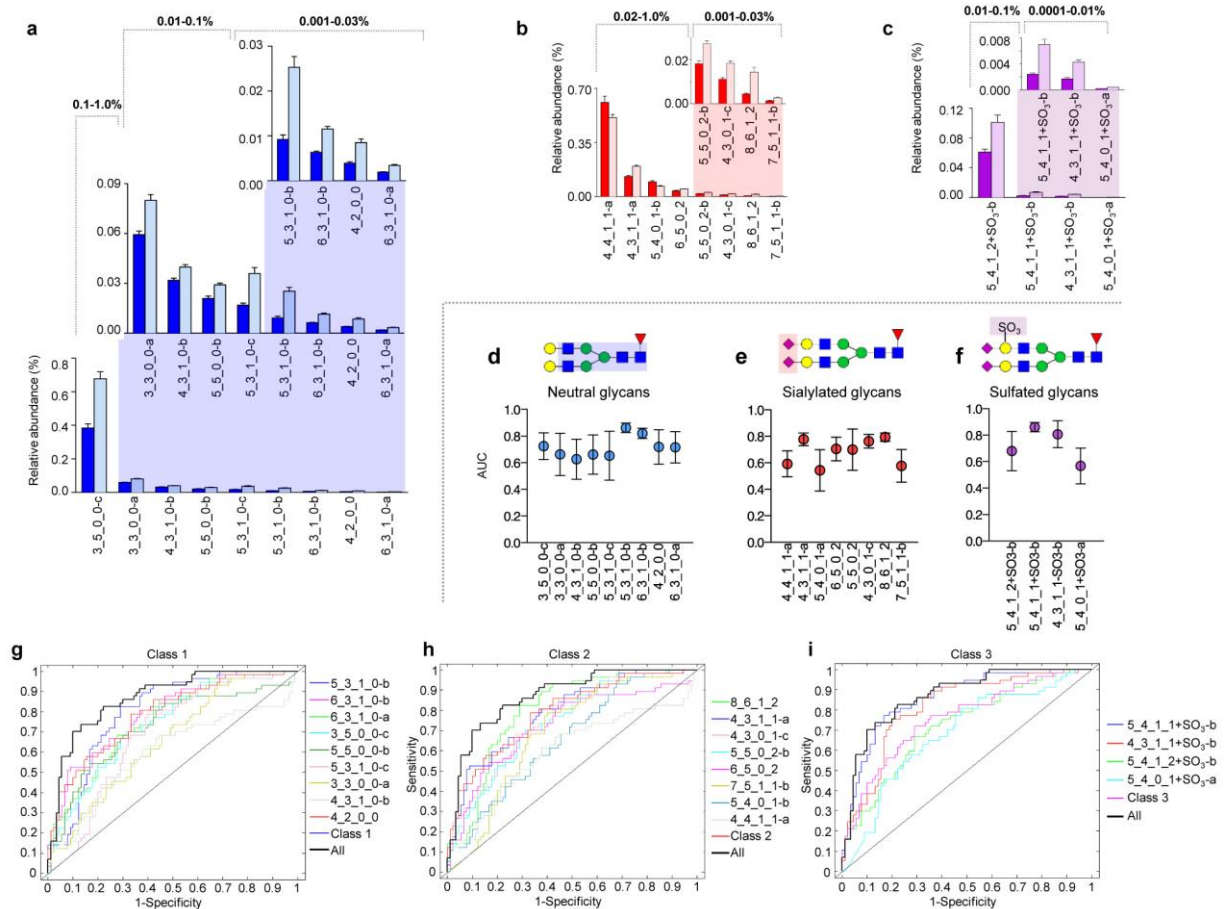

**Supplementary Figure 9 | N-Glycan biomarkers of RA (Training set)** (a-c) Relative abundances of 9 neutral, 8 sialylated and 4 sulfated N-glycan biomarkers on the serum IgGs of healthy subjects (dark column,  $n = 57$ ) and RA patients (light column,  $n = 90$ ), data are shown as mean  $\pm$  s.d.. (d-f) AUC values for the ROC analysis of the potential N-glycan biomarkers, data are shown as mean  $\pm$  s.d.. (g-i) ROC curves of neutral, sialylated and sulfated N-glycan biomarkers. In each of the plot, ROC curve of individual N-glycan biomarkers (with the legend of the N-glycan name), combined biomarkers of neutral N-glycans (with the legend of “class 1”), acidic N-glycans (with the legend of “class 2”) and sulfated N-glycan (with the legend of “class 3”) and all biomarkers (with the legend of “all”) were given.

**Supplementary Table 1 | Comparison of the limit of quantitation (LOQ) of neutral and acidic N-glycan standards by using TOF MS and QQQ MS in MRM mode.**

| Name                                                                      | Name    | LOQ_QTOF<br>(fmol) | LOQ_QQQ<br>(fmol) |
|---------------------------------------------------------------------------|---------|--------------------|-------------------|
| Hex <sub>5</sub> HexNAc <sub>4</sub> NeuAc <sub>1</sub>                   | 5_4_0_1 | 0.5441             | 0.016             |
| Hex <sub>5</sub> HexNAc <sub>4</sub> dHex <sub>1</sub> NeuAc <sub>1</sub> | 5_4_1_1 | 0.6389             | 0.008             |
| Hex <sub>5</sub> HexNAc <sub>4</sub> NeuAc <sub>2</sub>                   | 5_4_0_2 | 0.5989             | 0.017             |
| Hex <sub>5</sub> HexNAc <sub>4</sub> dHex <sub>1</sub> NeuAc <sub>2</sub> | 5_4_1_2 | 0.6568             | 0.008             |
| Hex <sub>6</sub> HexNAc <sub>5</sub> NeuAc <sub>3</sub>                   | 6_5_0_3 | 0.1453             | 0.003             |
| Hex <sub>4</sub> HexNAc <sub>4</sub>                                      | 4_4_0_0 | 0.6717             | 0.015             |
| Hex <sub>3</sub> HexNAc <sub>4</sub> dHex <sub>1</sub>                    | 3_4_1_0 | 0.6406             | 0.017             |
| Hex <sub>4</sub> HexNAc <sub>4</sub> dHex <sub>1</sub>                    | 4_4_1_0 | 0.645              | 0.008             |
| Hex <sub>3</sub> HexNAc <sub>5</sub> dHex <sub>1</sub>                    | 3_5_1_0 | 0.5623             | 0.007             |
| Hex <sub>3</sub> HexNAc <sub>6</sub>                                      | 3_6_0_0 | 0.6791             | 0.007             |
| Hex <sub>8</sub> HexNAc <sub>2</sub>                                      | 8_2_0_0 | 0.7073             | 0.007             |
| Hex <sub>3</sub> HexNAc <sub>1</sub> NeuAc <sub>1</sub>                   | LSTc    | 0.001              | 0.0001            |

**Supplementary Table 2 | Linearity of neutral and acidic N-glycan standards by using TOF MS and QQQ MS in MRM mode.**

| Name                                                                      | Abbreviation | QQQ                          |                   |        |       | Q - TOF                    |                   |        |       |
|---------------------------------------------------------------------------|--------------|------------------------------|-------------------|--------|-------|----------------------------|-------------------|--------|-------|
|                                                                           |              | Calibration equations        | Linear range (nM) | $R^2$  | $n^a$ | Calibration equations      | Linear range (nM) | $R^2$  | $n^a$ |
| Hex <sub>5</sub> HexNAc <sub>4</sub> NeuAc <sub>1</sub>                   | 5_4_0_1      | $y = 203,886.0x + 388,772.5$ | 0.08 - 80.59      | 0.9935 | 11    | $y = 4,762.8x + 141.7$     | 0.54 - 34.88      | 0.9939 | 5     |
| Hex <sub>5</sub> HexNAc <sub>4</sub> NeuAc <sub>2</sub>                   | 5_4_0_2      | $y = 165,877.9x + 388,535.7$ | 0.16 - 84.39      | 0.9913 | 10    | $y = 12,543.1x + 7,727.7$  | 0.60 - 38.39      | 0.9994 | 5     |
| Hex <sub>5</sub> HexNAc <sub>4</sub> dHex <sub>1</sub> NeuAc <sub>1</sub> | 5_4_1_1      | $y = 237,431.6x + 457,755.5$ | 0.08 - 82.57      | 0.9972 | 11    | $y = 9,061.5x + 10,740.5$  | 0.64 - 40.96      | 0.9977 | 5     |
| Hex <sub>5</sub> HexNAc <sub>4</sub> dHex <sub>1</sub> NeuAc <sub>2</sub> | 5_4_1_2      | $y = 73,671.8x + 97,950.9$   | 0.08 - 83.00      | 0.9977 | 11    | $y = 8,147.8x + 5,560.5$   | 0.66 - 42.10      | 0.9992 | 5     |
| Hex <sub>6</sub> HexNAc <sub>5</sub> NeuAc <sub>3</sub>                   | 6_5_0_3      | $y = 90,434.3x + 107,231.8$  | 0.11 - 57.74      | 0.9989 | 9     | $y = 2,120.1x + 1,726.4$   | 1.16 - 37.26      | 0.9976 | 5     |
| Hex <sub>3</sub> HexNAc <sub>4</sub>                                      | 3_4_0_0      | $y = 77,675.0x + 98,827.0$   | 0.07 - 35.46      | 0.9961 | 10    | $y = 2,739.7x + 1,347.1$   | 0.29 - 18.89      | 0.9919 | 5     |
| Hex <sub>4</sub> HexNAc <sub>4</sub>                                      | 4_4_0_0      | $y = 180,869.0x + 187,199.4$ | 0.07 - 37.38      | 0.9951 | 10    | $y = 8,532.1x + 7,401.6$   | 0.34 - 21.53      | 0.9917 | 5     |
| Hex <sub>3</sub> HexNAc <sub>4</sub> dHex <sub>1</sub>                    | 3_4_1_0      | $y = 197,656.6x + 370,830.0$ | 0.04 - 43.16      | 0.9924 | 11    | $y = 11,659.0x + 11,899.0$ | 0.32 - 20.53      | 0.9901 | 5     |
| Hex <sub>4</sub> HexNAc <sub>4</sub> dHex <sub>1</sub>                    | 4_4_1_0      | $y = 138,797.6x + 347,433.5$ | 0.04 - 82.65      | 0.9911 | 12    | $y = 7,693.3x + 6,158.7$   | 0.32 - 20.67      | 0.9959 | 5     |
| Hex <sub>5</sub> HexNAc <sub>4</sub>                                      | 5_4_0_0      | $y = 283,463.1x + 300,211.4$ | 0.07 - 36.34      | 0.9900 | 9     | $y = 14,544.4x + 8,436.6$  | 0.28 - 18.17      | 0.9915 | 5     |
| Hex <sub>3</sub> HexNAc <sub>5</sub>                                      | 3_5_0_0      | $y = 273,715.0x + 232,268.1$ | 0.07 - 36.68      | 0.9928 | 10    | $y = 7,718.3x + 5,950.6$   | 0.29 - 18.34      | 0.9905 | 5     |
| Hex <sub>7</sub> HexNAc <sub>2</sub>                                      | 7_2_0_0      | $y = 67,756.7x + 101,788.0$  | 0.12 - 32.05      | 0.9944 | 9     | $y = 1,509.1x + 368.5$     | 0.50 - 16.02      | 0.9989 | 4     |
| Hex <sub>8</sub> HexNAc <sub>2</sub>                                      | 8_2_0_0      | $y = 60,665.4x + 100,022.0$  | 0.12 - 32.86      | 0.9908 | 9     | $y = 1,850.6x + 1,015.4$   | 0.71 - 22.66      | 0.9971 | 4     |

<sup>a</sup>The point number of spiked calibration solutions used for linearity testing.

**Supplementary Table 3 | The on-chip enrichment recovery rate (%) of acidic N-glycans (*n* = 3).**

| Name                                                                      | Abbreviation | Acidic N-glycan standards <sup>a</sup> |                 | Acidic N-glycan standards spiked into neutral N-glycan mixture of IgGs <sup>a,b</sup> |                 |
|---------------------------------------------------------------------------|--------------|----------------------------------------|-----------------|---------------------------------------------------------------------------------------|-----------------|
|                                                                           |              | 1.56 nM                                | 12.5 nM         | 1.56 nM                                                                               | 12.5 nM         |
| Hex <sub>5</sub> HexNAc <sub>4</sub> NeuAc <sub>1</sub>                   | 5_4_0_1      | 96.33 (17.42%)                         | 90.73 (5.67%)   | 84.07 (12.90%)                                                                        | 105.93 (4.60%)  |
| Hex <sub>5</sub> HexNAc <sub>4</sub> dHex <sub>1</sub> NeuAc <sub>1</sub> | 5_4_1_1      | 92.07 (19.82%)                         | 97.29 (9.14%)   | 83.70 (7.23%)                                                                         | 113.22 (2.33%)  |
| Hex <sub>5</sub> HexNAc <sub>4</sub> NeuAc <sub>2</sub>                   | 5_4_0_2      | 105.39 (14.68%)                        | 85.72 (13.88%)  | 112.30 (9.74%)                                                                        | 111.75 (6.97%)  |
| Hex <sub>5</sub> HexNAc <sub>4</sub> dHex <sub>1</sub> NeuAc <sub>2</sub> | 5_4_1_2      | 83.19 (4.84%)                          | 81.27 (10.15%)  | 82.09 (13.99 %)                                                                       | 105.64 (15.09%) |
| Hex <sub>6</sub> HexNAc <sub>5</sub> NeuAc <sub>3</sub>                   | 6_5_0_3      | 92.76 (7.81%)                          | 100.01 (18.93%) | 89.89 (8.57%)                                                                         | 99.23 (18.62%)  |

<sup>a</sup> the number in the bracket denotes RSD of triplet measurements.

<sup>b</sup> neutral N-glycan mixture of IgGs was prepared from the total N-glycans released from the pooled human serum IgGs by using offline SAX method.

**Supplementary Table 4 | Clinical features of AS patients and healthy subjects.**

| Clinical features       | AS patients<br>( <i>n</i> = 34) | Healthy subjects<br>( <i>n</i> = 27) | <i>P</i> -value <sup>#</sup> |
|-------------------------|---------------------------------|--------------------------------------|------------------------------|
| Age, years              | 37.9 ± 13.8                     | 35.2 ± 13.5                          | 0.37                         |
| Gender (female), %      | 17.6                            | 33.3                                 | 0.23                         |
| Disease duration, years | 10.7 ± 10.8                     | ND                                   |                              |
| HLA-B27 positive, %     | 100                             | ND                                   |                              |
| ESR, mm h <sup>-1</sup> | 27.9 ± 31.5                     | ND                                   |                              |
| CRP, mg l <sup>-1</sup> | 2.1 ± 2.5                       | ND                                   |                              |

Values are the means ± s.d..

ND, not determined; HLA-B27, human leukocyte antigen B27; ESR, erythrocyte sedimentation rate; CRP, C-reactive protein

<sup>#</sup>*P*-values were calculated by the non-parametric Mann-Whitney test for age and by the Fisher's exact test for gender, two-sided.

**Supplementary Table 5 | Clinical features of OA patients and healthy subjects**

| Clinical features       | Knee OA patients<br>( <i>n</i> = 26) | Healthy subjects<br>( <i>n</i> = 45) | <i>P</i> -value <sup>#</sup> |
|-------------------------|--------------------------------------|--------------------------------------|------------------------------|
| Age, years              | 63.1 ± 17.1                          | 59.3 ± 11.6                          | 0.17                         |
| Gender (female), %      | 73.1                                 | 66.7                                 | 0.61                         |
| Disease duration, years | 2.6 ± 4.5                            | ND                                   |                              |
| ESR, mm h <sup>-1</sup> | 26.5 ± 23.9                          | ND                                   |                              |
| CRP, mg l <sup>-1</sup> | 1.1 ± 2.5                            | ND                                   |                              |

Values are the means ± s.d..

ND, not determined; ESR, erythrocyte sedimentation rate; CRP, C-reactive protein

<sup>#</sup>*P*-values were calculated by the non-parametric Mann-Whitney test for age and by the Fisher's exact test for gender, two-sided.

## Supplementary Methods

**Materials and reagents.** All N-glycan standards, including neutral N-glycans (Hex<sub>3</sub>HexNAc<sub>4</sub>, Hex<sub>4</sub>HexNAc<sub>4</sub>, Hex<sub>5</sub>HexNAc<sub>4</sub>, Hex<sub>3</sub>HexNAc<sub>4</sub>dHex<sub>1</sub>, Hex<sub>4</sub>HexNAc<sub>4</sub>dHex<sub>1</sub>, Hex<sub>5</sub>HexNAc<sub>4</sub>dHex<sub>1</sub>, Hex<sub>3</sub>HexNAc<sub>5</sub>, Hex<sub>6</sub>HexNAc<sub>5</sub>, Hex<sub>3</sub>HexNAc<sub>5</sub>dHex<sub>1</sub>, Hex<sub>5</sub>HexNAc<sub>5</sub>dHex<sub>1</sub>, Hex<sub>3</sub>HexNAc<sub>6</sub>, and Hex<sub>7</sub>HexNAc<sub>6</sub>), acidic N-glycans (Hex<sub>5</sub>HexNAc<sub>4</sub>NeuAc<sub>1</sub>, Hex<sub>5</sub>HexNAc<sub>4</sub>NeuAc<sub>2</sub>, Hex<sub>5</sub>HexNAc<sub>4</sub>dHex<sub>1</sub>NeuAc<sub>1</sub>, Hex<sub>5</sub>HexNAc<sub>4</sub>dHex<sub>1</sub>NeuAc<sub>2</sub>, and Hex<sub>6</sub>HexNAc<sub>5</sub>NeuAc<sub>3</sub>), high mannose N-glycans (Hex<sub>5</sub>HexNAc<sub>2</sub>, Hex<sub>6</sub>HexNAc<sub>2</sub>, Hex<sub>7</sub>HexNAc<sub>2</sub>, and Hex<sub>8</sub>HexNAc<sub>2</sub>), and an acidic O-glycan (LSTc), were purchased from Prozyme (Hayward, CA, USA). rProtein A Sepharose™ 4 Fast Flow (90 μm) was obtained from GE Healthcare (Uppsala, Sweden). PNGase F (500,000 units/mL) was purchased from New England BioLabs, Inc. (Beverly, MA, USA). The dye reagent concentrate for the protein assay was purchased from Bio-Rad (Hercules, CA, USA). Recombinant human N-acetylglucosamine-6-sulfatase (NG6S) was purchased from Novoprotein (Summit, NJ, USA), and galactose-6-sulfatase (GALNS) was purchased from Abnova. Sialidase C was purchased from Glyko Biomedical Ltd., and other exoglycosidases, including β1-4 galactosidase, β-N-acetyl glucosaminidase and α1-2,3 mannosidase, were purchased from New England BioLabs Inc. Multiscreen Solvinert Filter plates (96 wells, 0.45 μm, hydrophilic PTFE) and Amicon Ultra-0.5 100K centrifuge filter devices were purchased from Millipore (Merck Millipore, County Cork, Ireland). V-bottom 96-well collection plates and Sep-Pak C<sub>18</sub> cartridges were purchased from GE Healthcare and Waters (Milford, MA, USA), respectively. SAX Ultra-Micro SpinColumns were purchased from Harvard Apparatus (Holliston, MA, USA), and HyperSep Hypercrab PGC cartridges were purchased from Thermo Fisher Scientific (Pittsburgh, PA, USA). Acetonitrile and methanol (both LC-MS grade) were purchased from Avantor (Center Valley, PA, USA), and LC-MS-grade FA, acetic acid and ammonia were purchased from Sigma-Aldrich (St. Louis, MO, USA). All other chemicals were of analytical reagent grade. Distilled water was prepared using a Milli-Q system (Millipore Ltd., Watford, UK).

**Preparation of standard solutions.** N-glycan standards were individually reconstituted in distilled water to yield stock solutions at a concentration of 100 μg ml<sup>-1</sup>. The resulting individual stock solutions were then mixed and diluted to generate a series of working solutions (0.003-400 nM) for standard curve construction and the assessment of sensitivity and repeatability. Five



acidic N-glycan standards were mixed to prepare an additional stock solution of mixed acidic N-glycan standards, which was further diluted to 2 different concentrations (1.56 nM and 12.5 nM) to evaluate the on-chip enrichment recovery rate. For the binding capacity assessment, each acidic N-glycan was diluted individually to concentrations ranging from 10 to 5120 nM. All of the stock solutions were stored at -20°C before use, and all of the working solutions were freshly prepared.

**Purity of the captured IgGs.** Purity of the captured IgGs was examined by using SDS-PAGE and SEC method. For SDS-PAGE, analysis by Image J was performed to verify the purity of IgG. Both Silver Staining (SS) and Coomassie Brilliant Blue (CBB) staining demonstrated that the purity of captured IgGs was **greater than 99%**. In SEC method, purity defined as the percentage of peak area of IgGs relative to the sum of peak area of all proteins detected was calculated to be 97.3 %.

**Binding capacity of acidic N-glycans on the TiO<sub>2</sub>-PGC chip.** The acidic N-glycans binding capacity of the TiO<sub>2</sub>-PGC chip was evaluated using a breakthrough experiment. Serial concentrations of the individual acidic N-glycan standards were loaded onto and subsequently eluted from the enrichment column of the TiO<sub>2</sub>-PGC chip. The amount of acidic N-glycan eluted in the loading and elution steps was determined using on-line detection. The overloaded fraction was collected from the waste tube and concentrated for analysis. The breakthrough percentage was calculated using the following formula: (signal in loading step + signal in overloaded fraction) / total signal × 100%. The breakthrough curve was constructed using the percentage of breakthrough against the N-glycan concentration, and the binding capacity was estimated as the amount of binding that occurred before the breakthrough percentage reached 10% (QB<sub>10</sub>).

**Offline enrichment of acidic N-glycans using SAX spin columns.** SAX spin columns were preconditioned using 3 bed volumes of 0.05% FA aqueous solution 3 times. The total N-glycans released from serum IgG were resuspended in a 0.05% FA aqueous solution before passing through the preconditioned SAX spin column. The spin columns were then washed twice with 3 bed volumes of 0.05% FA, and the bound acidic N-glycans were eluted twice using 3 bed volumes of 1 M NaCl. The eluate was desalted using a PGC cartridge column and dried by speed vacuum. In the PGC desalting procedure, the column was preconditioned with 5 bed volumes each of ACN and 0.1% FA. The sample was loaded using gravity settling and then washed twice

with 1 bed volume of 0.1% FA. The bound acidic N-glycans were eluted twice using 1 bed volume of 80% ACN (pH 7.0, adjusted with 0.5% FA). The unbound neutral N-glycan fraction was treated as a complex neutral N-glycan mixture for subsequent validation experiments.

**Comparison of the enrichment performance of the TiO<sub>2</sub>-PGC chip and offline SAX for acidic N-glycans.** The total N-glycans of the serum IgG were analyzed using the TiO<sub>2</sub>-PGC chip coupled to a Q-TOF MS as described above, whereas the bound acidic N-glycans eluted from the SAX spin columns were analyzed using a PGC chip coupled to a Q-TOF MS. The number and pattern of acidic N-glycans obtained using both methods were compared to evaluate the enrichment of acidic N-glycans. Additionally, 6 replicates of the analysis under both methods were performed to assess the reproducibility of the TiO<sub>2</sub>-PGC chip and offline SAX in terms of relative standard deviation (RSD%).

**HPLC conditions for PGC chip.** The PGC chip consisted of a 75  $\mu\text{m} \times 150$  mm analytical column and a 75  $\mu\text{m} \times 9$  mm enrichment column, and both were packed with 5  $\mu\text{m}$  PGC as the stationary phase. A flow rate of 3  $\mu\text{l min}^{-1}$  of 0.1% FA in water was used for sample loading with a 2  $\mu\text{l}$  injection volume. The mobile phase for the nanopump consisted of 0.5% FA in water adjusted to pH 3 with an ammonia solution (A) and 1% FA in ACN (B) for acidic N-glycan analysis; for neutral N-glycans, the mobile phase consisted of 1% FA in water (A) and ACN (B). The flow rate was 0.5  $\mu\text{l min}^{-1}$ , and the gradient was as follows: 5% B for 6 min, 5 to 60% B over 10 min, and 80% B for 3 min. An equilibrium time of 18 min was set before each injection.

**Method validation.** *Calibration curves.* A linear regression equation,  $y = ax + b$ , was defined to correlate the peak area to the N-glycan concentration. The linearity was verified using correlation coefficients ( $R^2$ ), and the slope ( $a$ ) of the standard curve represented the MS response factors of each N-glycan. The linear range and response factors of each N-glycan standard measured on QQQ MS in the MRM mode and Q-TOF MS were compared.

*On-chip enrichment recovery.* Two concentrations of an acidic N-glycan standard mixture (1.56 nM and 12.5 nM) and the same concentration of an acidic N-glycan standard mixture spiked into a complex neutral N-glycan mixture were analyzed using the TiO<sub>2</sub>-PGC chip in the forward (with enrichment) and backward flush modes (without enrichment), respectively. The signal of each acidic N-glycan in both flush modes was measured in 6 replicates using QQQ MS in the

MRM mode. The recovery rate was calculated using the following formula: signal in forward flush mode / signal in backward flush mode  $\times$  100%.

*Sensitivity.* The limits of quantification (LOQs) were determined using the response at a S/N of 10. Using QQQ MS in the MRM mode and Q-TOF MS, the sensitivity of each N-glycan standard versus an internal acidic O-glycan standard (LSTc) was compared relative to LOQ. The acidic N-glycan sensitivity with and without on-chip enrichment was also compared according to the MRM signal of the LSTc, which was spiked into a complex neutral N-glycan mixture derived from the total N-glycans of serum IgG.

*Repeatability.* Three concentrations of a total N-glycan standard mixture (0.19 nM, 1.56 nM and 12.5 nM) were analyzed using the TiO<sub>2</sub>-PGC chip and QQQ MS in the MRM mode for 6 replicates. The repeatability of the TiO<sub>2</sub>-PGC chip was compared with that of the PGC chip in terms of RSD%.
